# Supplementary material for: Fog-like fluffy structured N-doped carbon with a superior oxygen reduction reaction performance to a commercial Pt/C catalyst
Source: Royal Society of Chemistry journal article supplement (doi:10.1039/c4nr06749e), 2015-01-01
Supplement: c4nr06749e1.pdf [file c4nr06749e1.pdf]

## **Supporting information**

### **Fog-like fluffy structured N-doped carbon with superior oxygen reduction reaction performance to commercial Pt/C catalyst**

Chenghang You, Xiaochang Qiao, Xiaoyuan Zeng, Fangfang Liu, Ting Shu, Li Du,  
Jianhuang Zeng, Shijun Liao\*

The Key Laboratory of Fuel Cell Technology of Guangdong Province, School of  
Chemistry and Chemical Engineering, South China University of Technology,  
Guangzhou, 510641, China

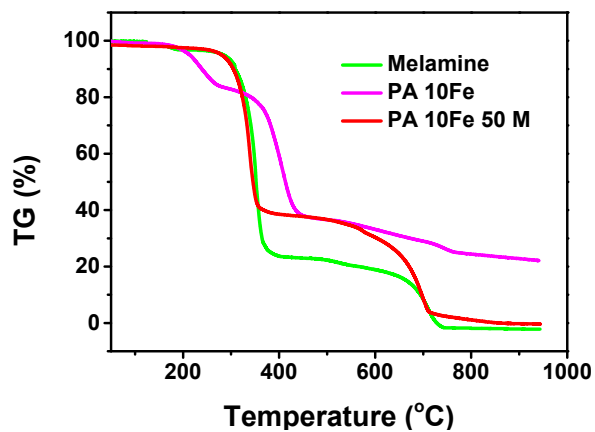

Fig. 1S TGA curves of various precursors, where PA 10Fe refers to the mixture of PA (2.02 g) and  $\text{FeCl}_3$  (0.65 g) and PA 10Fe 50M refers to the blend of PA (2.02 g),  $\text{FeCl}_3$  (0.65 g) and melamine (50 g).

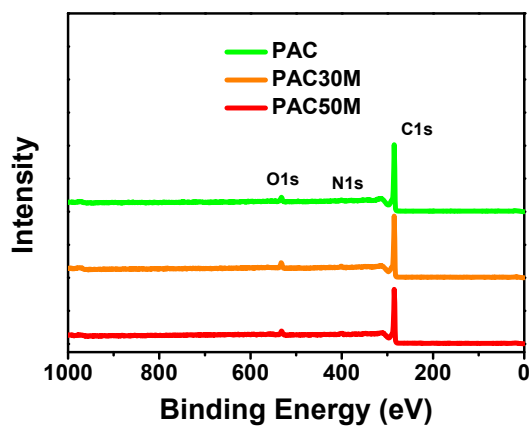

Fig. 2S XPS of PAC, PAC30M, PAC50M

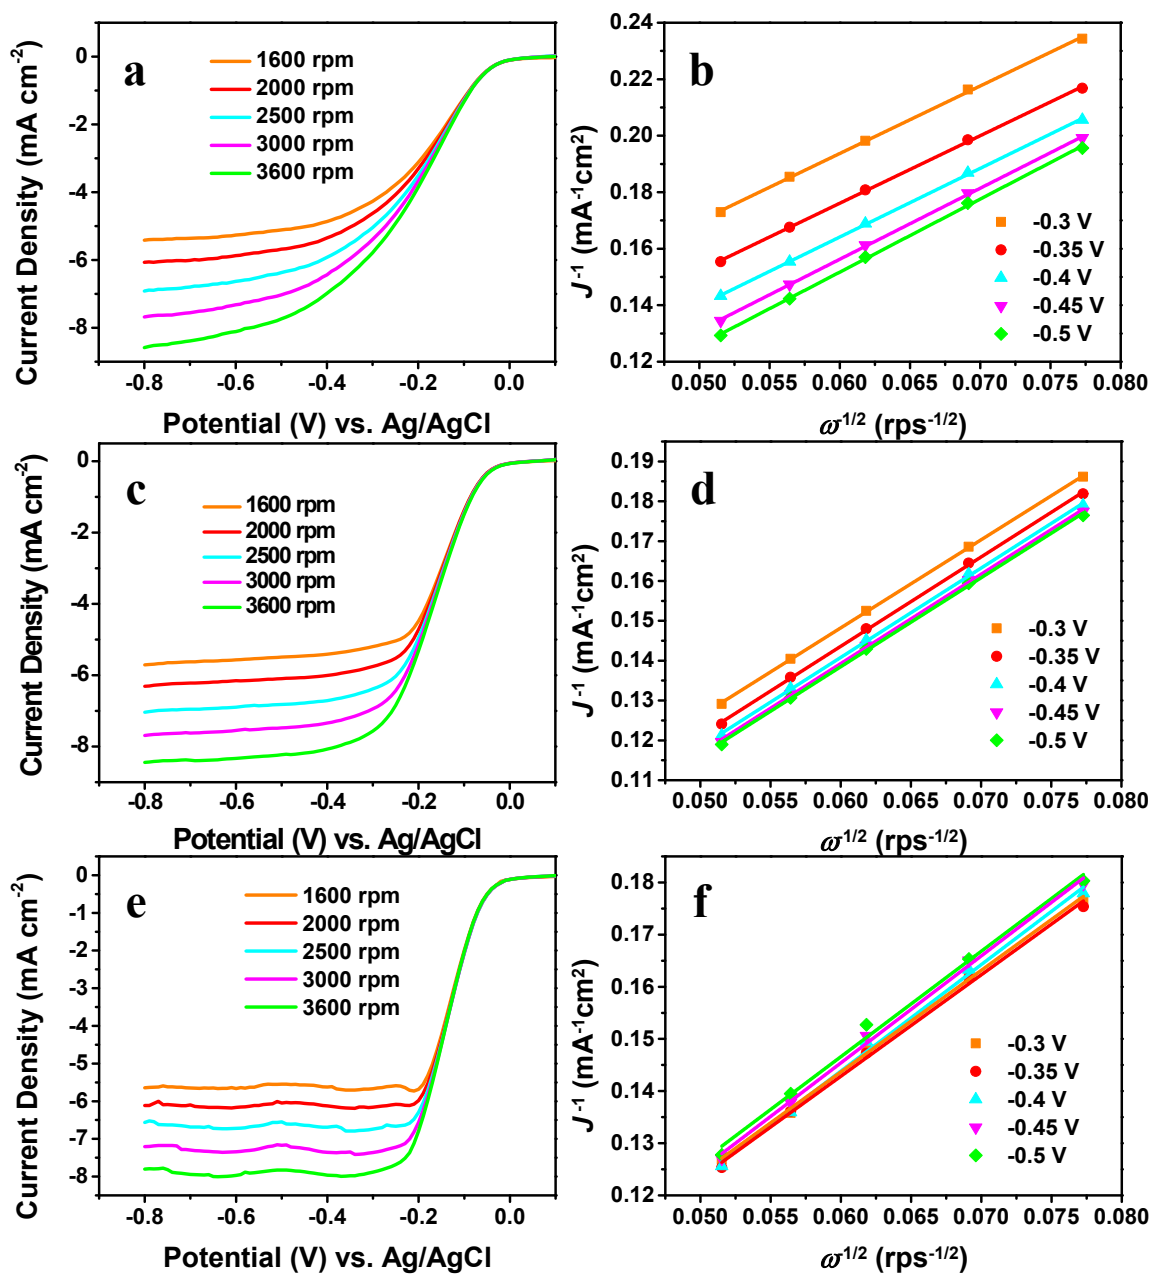

Fig. 3S (a), (b) LSVs at various rotation rates and K-L plots for CPA; (c), (d) LSVs at various rotation rates and K-L plots for CPA30M; (e), (f) LSVs at various rotation rates and K-L plots for CPA50M.
